# Supplementary material for: Magnetic mesoporous Fe3O4@nSiO2@mSiO2 nanoparticles for high-throughput mass spectrometry detection of hydrolyzed products of organophosphorus nerve agents
Source: Royal Society of Chemistry journal article supplement (doi:10.1039/d3ay01785k), 2023-11-21

## Supporting information

for

# Magnetic mesoporous $\text{Fe}_3\text{O}_4@\text{nSiO}_2@\text{mSiO}_2$ nanoparticles for high throughput mass spectrometry detection of hydrolyzed products of organophosphorus nerve agents

### 1 Chromatogram of LODs and LOQs of five MPs detected by M-QuEChERS-DART-MS/MS in exposed plant matrix

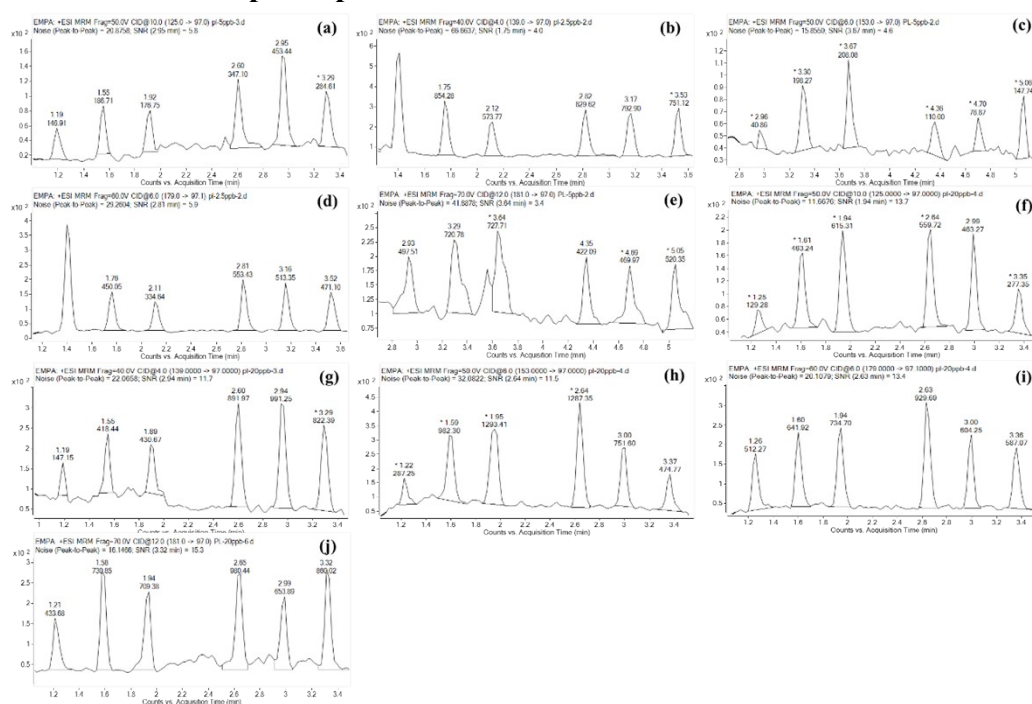

### 2 Chromatogram of LODs and LOQs of five MPs detected by M-QuEChERS-DART-MS/MS in exposed soil matrix

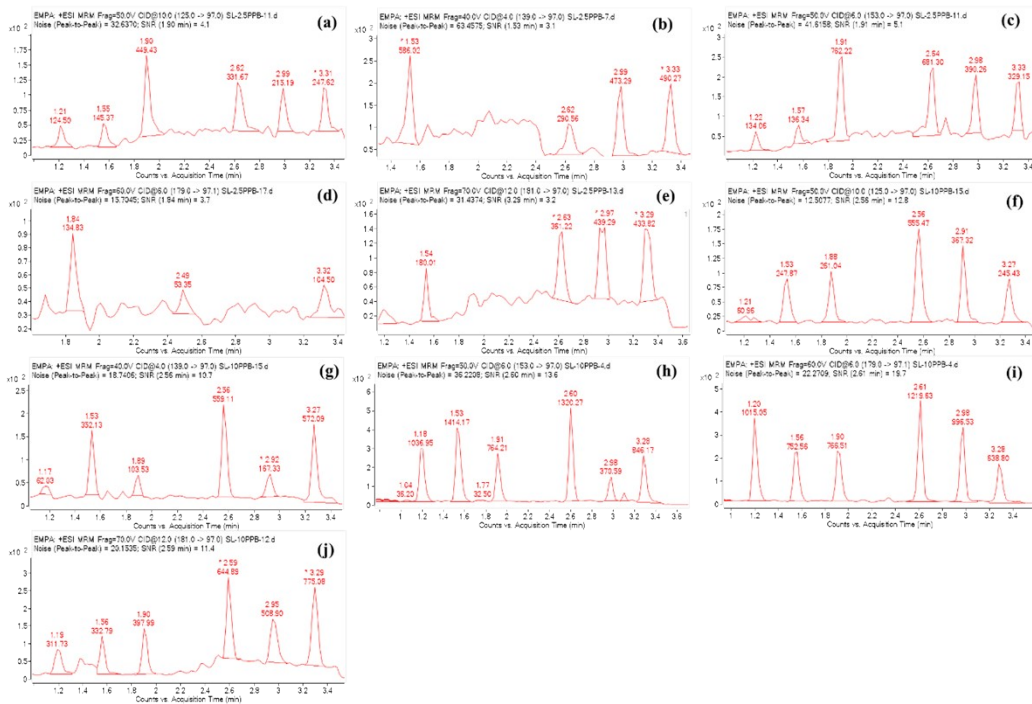

### 3 Chromatogram of LODs and LOQs of five MPs detected by M-QuEChERS-DART-MS/MS in exposed river water matrix

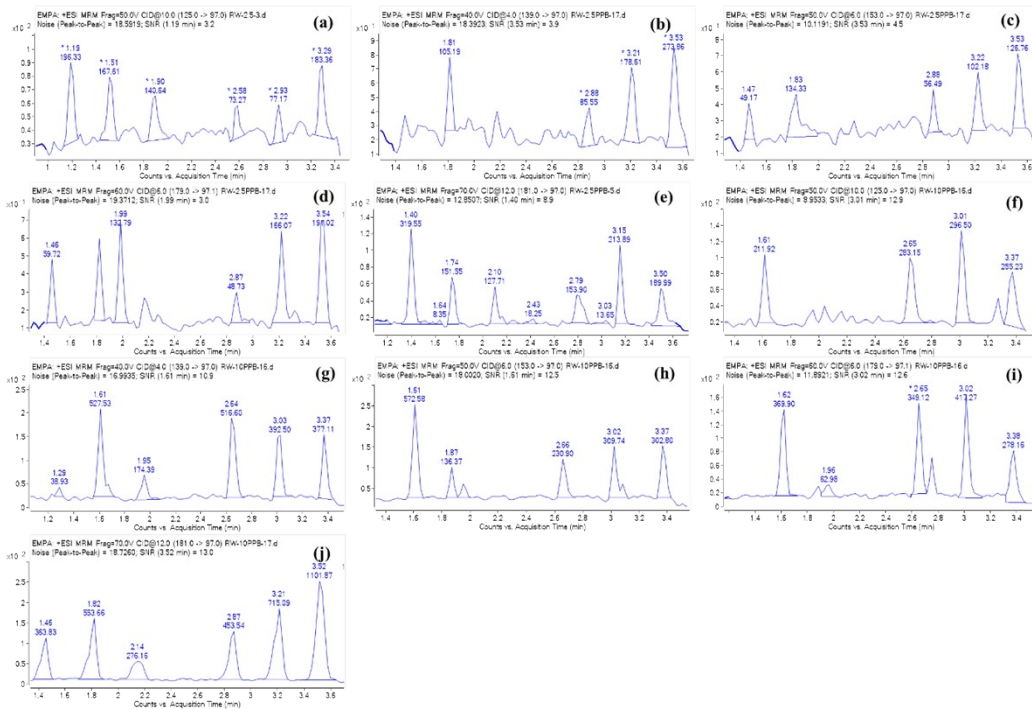

Supplement: d3ay01785k1.pdf [file d3ay01785k1.pdf]
